# Supplementary material for: Personalized ECG Arrhythmia Classification Using Single Normal Beat Guidance: A Minimal Supervision Approach for Atypical Morphology Cases
Source: Research Square preprint supplement (doi:10.21203/rs.3.rs-7966938/v1), 2025-11-12
Supplement: Supplementary file 1 [file e4aa8369c521ec0105906afb.docx]

**SUPPLEMENTARY MATERIALS**

**Personalized ECG Arrhythmia Classification Using Single Normal Beat Guidance: A Minimal Supervision Approach for Atypical Morphology Cases**

Junho An¹,†, Kwanglo Lee¹,†, Sunghoon Jung¹, and Jinkook Kim¹,*

¹ HUINNO Co., Ltd., 19, Apgujeong-ro 79-gil, Gangnam-gu, Seoul, 06011, Republic of Korea

*Corresponding author: jinkook@huinno.com

†These authors contributed equally to this work.

**1. Patch dataset**

**1.1 MEMO patch device**


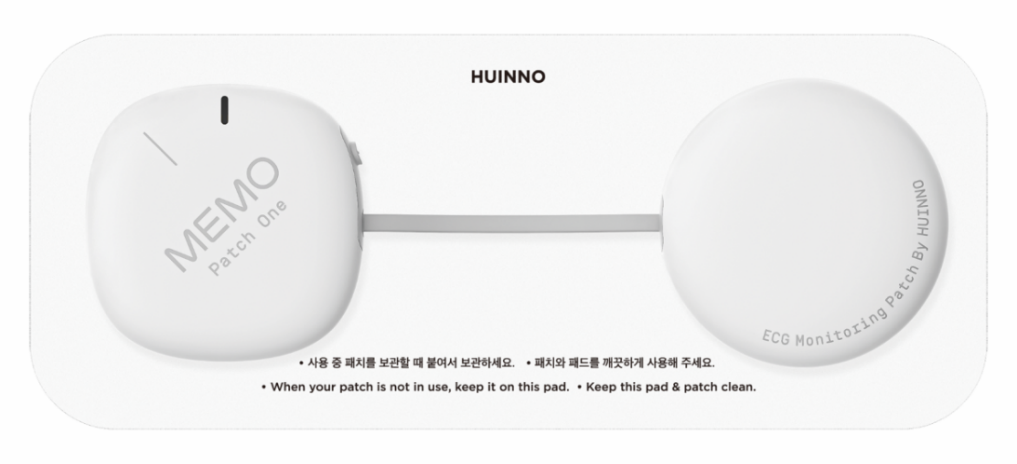


**Fig. S1.** MEMO Patch

MEMO Patch is a single-lead, adhesive, patch-type ambulatory electrocardiograph approved by the Ministry of Food and Drug Safety in the Republic of Korea. The device can operate for up to 14 days and can record ECGs at a sampling rate of 250 Hz and a 12-bit resolution. Further, it is powered by a CR2430 coin cell battery. The device, including the battery, weighs 35g.

**1.2 Examples of typical and atypical ECGs**


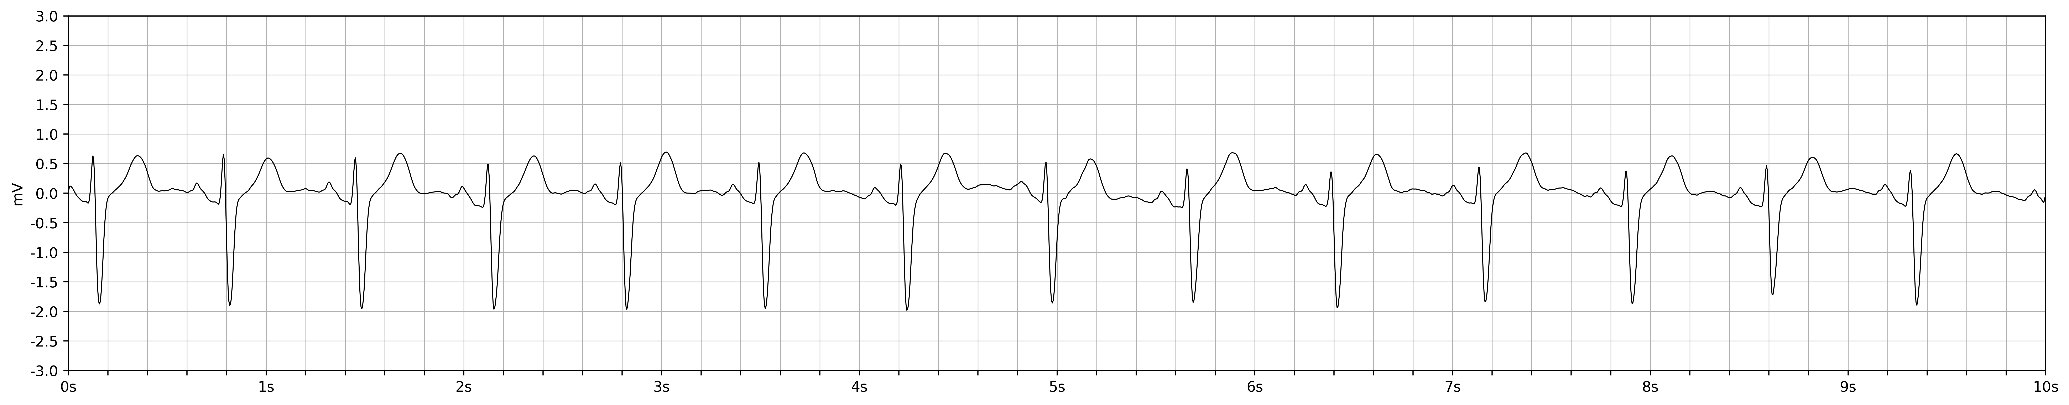


**Fig. S2.** Typical ECG


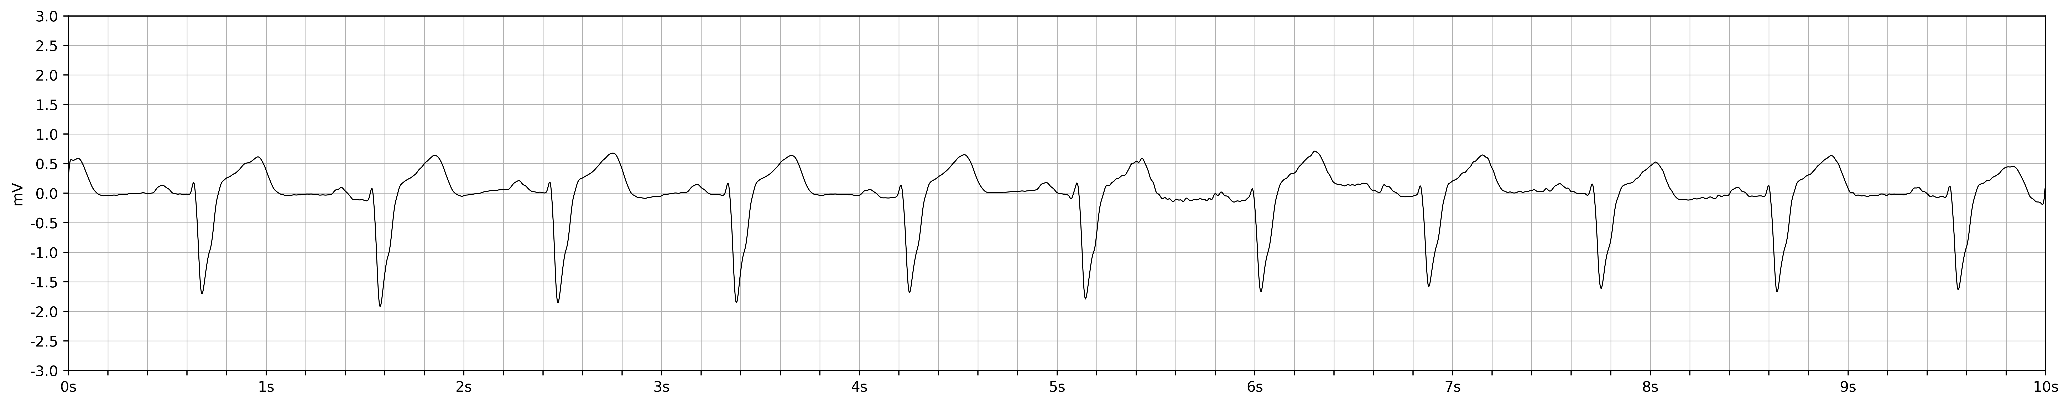


**Fig. S3.** Atypical ECG

**2. MIT-BIH descriptions with AAMI standard**

**Table S1.** Conversion table of AAMI criteria and MIT-BIH heartbeat annotations. This table summarizes how the American Association of Medical Instrumentation (AAMI) arrhythmia classes (left column) align with the corresponding MIT-BIH symbols and detailed heartbeat types (middle and right columns) in the MIT-BIH Arrhythmia Database.

| **AAMI Class** | **MIT-BIH Symbol** | **MIT-BIH Heartbeat Types** |
| --- | --- | --- |
| N (Non-ectopic beats) | *N* | Normal beat |
|  | *L* | Left bundle branch block beat |
|  | *R* | Right bundle branch block beat |
|  | *j* | Nodal (junctional) escape beat |
|  | *e* | Atrial escape beat |
|  | *n* | Supraventricular escape beat (atrial or nodal) |
| S (Supraventricular ectopic beats) | *A* | Atrial premature beat |
|  | *a* | Aberrated atrial premature beat |
|  | *J* | Nodal (junctional) premature beat |
|  | *S* | Supraventricular premature beat |
| V (Ventricular ectopic beats) | *V* | Premature ventricular contraction beat |
|  | *E* | Ventricular escape beat |
|  | *r* | R-on-T premature ventricular contraction |
| Q (Unknown beats) | *B* | Bundle branch block beat (unspecified) |
|  | *F* | Fusion of ventricular and normal beat |
|  | / | Paced beat |
|  | *f* | Fusion of paced and normal beats |
|  | *Q* | Unclassifiable beat |
|  | ? | Beat not classified during learning |
|  | ! | Ventricular flutter wave |

**Table S2.** MIT-BIH dataset rhythm annotations. This table outlines the standard rhythm annotation symbols (left column) defined in the MIT-BIH Arrhythmia Database, along with brief descriptions (right column). For example, (AFIB indicates atrial fibrillation, whereas (VT refers to ventricular tachycardia.

| **MIT-BIH Symbol** | **Description** |
| --- | --- |
| (AB | Atrial bigeminy |
| (AFIB | Atrial fibrillation |
| (AFL | Atrial flutter |
| (B | Ventricular bigeminy |
| (BII | 2° heart block |
| (IVR | Idioventricular rhythm |
| (N | Normal sinus rhythm |
| (NOD | Nodal (A-V junctional) rhythm |
| (P | Paced rhythm |
| (PREX | Pre-excitation (WPW) |
| (SBR | Sinus bradycardia |
| (SVTA | Supraventricular tachyarrhythmia |
| (T | Ventricular trigeminy |
| (VFL | Ventricular flutter |
| (VT | Ventricular tachycardia |

**3. Experiment results**

This section summarizes classification outcomes for both the Patch dataset (Section 3.1) and the MIT-BIH dataset (Section 3.2). In each dataset, we evaluate two types of metrics—(a) overall performance and (b) per-patient performance—and present results in tables whose rows C1–C14 refer to the same set of feature/model configurations throughout.

**3.1 Patch results**

We conduct four separate experiments on the Patch dataset:

- T → T: Train on typical (T) data, test on T
- T → AT: Train on T, test on atypical (AT)
- T+AT → T: Train on combined T+AT, test on T
- T+AT → AT: Train on T+AT, test on AT

For each experiment, we provide two tables: one for overall performance and one for per-patient performance.

**Table S3.** T → T experiment Overall performance metrics. Classification results for the Patch dataset in which both training and testing are conducted on typical (T) samples only. Each Config represents a unique configuration described in Methods. We provide mean ± standard deviation of F1-scores and Accuracy across all beats.

| **Config** | **F1 score** | | | | **Accuracy** |
| --- | --- | --- | --- | --- | --- |
| **N** | **S** | **V** | **Macro** |
| C1 | 99.31 ± 0.08 | 91.91 ± 1.07 | 87.56 ± 2.02 | 92.93 ± 1.04 | 97.39 ± 0.36 |
| C2 | 99.36 ± 0.07 | 94.37 ± 0.71 | 93.76 ± 0.83 | 95.83 ± 0.51 | 98.23 ± 0.20 |
| C3 | 99.35 ± 0.11 | 93.99 ± 0.82 | 92.54 ± 1.20 | 95.29 ± 0.69 | 98.07 ± 0.27 |
| C4 | 99.35 ± 0.12 | 94.42 ± 0.59 | 93.65 ± 0.95 | 95.81 ± 0.54 | 98.22 ± 0.24 |
| C5 | 99.37 ± 0.09 | 94.18 ± 0.76 | 93.34 ± 1.06 | 95.63 ± 0.61 | 98.18 ± 0.23 |
| C6 | 99.29 ± 0.09 | 91.97 ± 1.26 | 87.75 ± 2.20 | 93.00 ± 1.15 | 97.40 ± 0.41 |
| C7 | 99.37 ± 0.08 | 94.35 ± 0.56 | 93.77 ± 0.62 | 95.83 ± 0.41 | 98.24 ± 0.17 |
| C8 | 99.39 ± 0.09 | 94.55 ± 0.61 | 93.95 ± 0.62 | 95.96 ± 0.43 | 98.29 ± 0.20 |
| C9 | 99.38 ± 0.08 | 94.54 ± 0.39 | 94.26 ± 0.53 | 96.06 ± 0.28 | 98.30 ± 0.14 |
| C10 | 99.38 ± 0.10 | 94.45 ± 0.88 | 94.05 ± 1.23 | 95.96 ± 0.73 | 98.28 ± 0.29 |
| C11 | 99.37 ± 0.09 | 94.41 ± 0.48 | 93.56 ± 0.85 | 95.78 ± 0.44 | 98.23 ± 0.18 |
| C12 | 99.38 ± 0.07 | 94.64 ± 0.51 | 94.14 ± 0.70 | 96.05 ± 0.40 | 98.31 ± 0.17 |
| C13 | 99.33 ± 0.09 | 93.91 ± 0.65 | 93.00 ± 0.62 | 95.41 ± 0.42 | 98.08 ± 0.19 |
| C14 | 99.36 ± 0.10 | 94.39 ± 0.69 | 93.88 ± 0.86 | 95.87 ± 0.54 | 98.24 ± 0.23 |

**Table S4.** T → T experiment Per-patient performance metrics. Classification results for the Patch dataset in which both training and testing are conducted on typical (T) samples only. Each Config represents a unique configuration described in Methods. We provide mean ± standard deviation of F1-scores and Accuracy across individual patients.

| **Config** | **F1 score** | | | | **Accuracy** |
| --- | --- | --- | --- | --- | --- |
| **N** | **S** | **V** | **Macro** |
| C1 | 99.22 ± 2.19 | 92.60 ± 12.45 | 80.80 ± 29.98 | 92.84 ± 11.58 | 97.33 ± 4.57 |
| C2 | 99.33 ± 1.77 | 94.83 ± 10.75 | 91.50 ± 20.56 | 95.97 ± 8.27 | 98.46 ± 3.61 |
| C3 | 99.27 ± 2.07 | 94.09 ± 12.22 | 90.38 ± 21.56 | 95.43 ± 8.98 | 98.22 ± 4.07 |
| C4 | 99.31 ± 1.85 | 94.76 ± 11.15 | 91.90 ± 19.75 | 96.01 ± 8.25 | 98.31 ± 3.72 |
| C5 | 99.33 ± 1.82 | 94.24 ± 12.38 | 91.00 ± 20.88 | 95.64 ± 8.80 | 98.24 ± 4.00 |
| C6 | 99.22 ± 2.47 | 92.60 ± 12.19 | 81.56 ± 29.40 | 93.03 ± 11.27 | 97.51 ± 4.54 |
| C7 | 99.33 ± 1.79 | 94.71 ± 10.82 | 91.62 ± 19.94 | 95.96 ± 8.13 | 98.34 ± 3.64 |
| C8 | 99.34 ± 1.85 | 94.74 ± 11.03 | 92.40 ± 18.50 | 96.16 ± 7.88 | 98.31 ± 3.81 |
| C9 | 99.33 ± 1.95 | 94.85 ± 10.76 | 92.64 ± 18.20 | 96.25 ± 7.93 | 98.34 ± 3.57 |
| C10 | 99.33 ± 1.80 | 94.65 ± 11.06 | 92.32 ± 19.00 | 96.09 ± 7.98 | 98.49 ± 3.48 |
| C11 | 99.33 ± 1.82 | 94.70 ± 10.84 | 92.28 ± 18.25 | 96.11 ± 7.75 | 98.30 ± 3.80 |
| C12 | 99.33 ± 1.78 | 94.93 ± 10.66 | 92.30 ± 19.16 | 96.19 ± 7.87 | 98.39 ± 3.59 |
| C13 | 99.26 ± 2.01 | 94.17 ± 11.91 | 90.76 ± 21.36 | 95.53 ± 8.88 | 98.21 ± 3.94 |
| C14 | 99.29 ± 1.92 | 94.59 ± 11.19 | 92.15 ± 19.49 | 96.01 ± 8.21 | 98.43 ± 3.62 |

**Table S5.** T → AT experiment Overall performance metrics. Classification results for the Patch dataset in which the model is trained on typical (T) samples and tested on atypical (AT) samples. Each Config represents a unique configuration described in Methods. We provide mean ± standard deviation of F1-scores and Accuracy across all beats.

| **Config** | **F1 score** | | | | **Accuracy** |
| --- | --- | --- | --- | --- | --- |
| **N** | **S** | **V** | **Macro** |
| C1 | 99.20 ± 0.19 | 85.44 ± 2.67 | 82.35 ± 5.82 | 89.00 ± 2.85 | 95.99 ± 0.90 |
| C2 | 98.95 ± 0.44 | 81.71 ± 1.98 | 71.42 ± 5.13 | 84.03 ± 2.33 | 94.38 ± 0.92 |
| C3 | 98.80 ± 0.57 | 76.88 ± 3.46 | 69.19 ± 4.66 | 81.62 ± 2.76 | 93.19 ± 1.42 |
| C4 | 98.56 ± 0.85 | 80.61 ± 3.91 | 71.45 ± 7.29 | 83.54 ± 3.94 | 93.96 ± 1.66 |
| C5 | 99.05 ± 0.15 | 79.66 ± 4.46 | 74.14 ± 4.57 | 84.28 ± 2.97 | 94.28 ± 1.11 |
| C6 | 99.16 ± 0.13 | 84.12 ± 2.13 | 79.18 ± 6.13 | 87.49 ± 2.73 | 95.53 ± 0.81 |
| C7 | 99.06 ± 0.28 | 82.71 ± 2.60 | 74.34 ± 5.46 | 85.37 ± 2.50 | 94.86 ± 0.85 |
| C8 | 99.15 ± 0.18 | 83.50 ± 4.11 | 75.86 ± 7.39 | 86.17 ± 3.83 | 95.16 ± 1.23 |
| C9 | 99.02 ± 0.25 | 83.09 ± 2.90 | 76.97 ± 4.82 | 86.36 ± 2.44 | 95.06 ± 0.80 |
| C10 | 99.07 ± 0.19 | 82.97 ± 3.77 | 75.59 ± 6.16 | 85.88 ± 3.21 | 95.03 ± 1.08 |
| C11 | 99.18 ± 0.10 | 82.48 ± 3.76 | 76.03 ± 5.04 | 85.89 ± 2.80 | 95.01 ± 0.84 |
| C12 | 99.09 ± 0.13 | 81.75 ± 3.19 | 74.16 ± 4.80 | 85.00 ± 2.56 | 94.73 ± 0.74 |
| C13 | 99.03 ± 0.20 | 82.92 ± 2.64 | 74.74 ± 2.11 | 85.56 ± 1.52 | 94.92 ± 0.55 |
| C14 | 99.12 ± 0.26 | 83.20 ± 2.46 | 75.41 ± 6.48 | 85.91 ± 2.94 | 95.08 ± 0.89 |

**Table S6.** T → AT experiment Per-patient performance metrics. Classification results for the Patch dataset in which the model is trained on typical (T) samples and tested on atypical (AT) samples. Each Config represents a unique configuration described in Methods. We provide mean ± standard deviation of F1-scores and Accuracy across individual patients.

| **Config** | **F1 score** | | | | **Accuracy** |
| --- | --- | --- | --- | --- | --- |
| **N** | **S** | **V** | **Macro** |
| C1 | 99.17 ± 1.48 | 85.56 ± 17.38 | 75.60 ± 31.44 | 87.49 ± 14.57 | 95.69 ± 4.44 |
| C2 | 98.86 ± 2.60 | 82.50 ± 21.62 | 68.07 ± 36.57 | 84.04 ± 17.63 | 94.59 ± 5.65 |
| C3 | 98.76 ± 2.60 | 74.08 ± 31.53 | 69.67 ± 33.57 | 81.69 ± 19.27 | 92.76 ± 7.68 |
| C4 | 98.43 ± 3.03 | 80.82 ± 21.78 | 67.94 ± 36.20 | 83.39 ± 17.41 | 93.58 ± 6.17 |
| C5 | 99.03 ± 1.93 | 77.88 ± 27.76 | 72.86 ± 32.09 | 84.03 ± 17.41 | 93.11 ± 7.51 |
| C6 | 99.16 ± 1.59 | 84.73 ± 18.15 | 72.93 ± 32.78 | 86.36 ± 15.20 | 95.68 ± 4.66 |
| C7 | 99.07 ± 1.86 | 83.12 ± 21.75 | 69.86 ± 36.04 | 84.92 ± 17.26 | 94.99 ± 5.24 |
| C8 | 99.09 ± 1.69 | 84.42 ± 19.32 | 70.21 ± 35.61 | 85.51 ± 16.81 | 94.59 ± 5.88 |
| C9 | 98.97 ± 1.95 | 82.34 ± 23.50 | 72.86 ± 34.00 | 85.53 ± 17.05 | 94.78 ± 5.12 |
| C10 | 99.01 ± 1.92 | 83.43 ± 20.99 | 70.01 ± 35.30 | 85.04 ± 16.85 | 93.92 ± 5.98 |
| C11 | 99.14 ± 1.59 | 82.18 ± 23.66 | 71.93 ± 33.78 | 85.29 ± 16.79 | 94.79 ± 4.94 |
| C12 | 99.06 ± 1.74 | 81.57 ± 23.62 | 69.96 ± 35.70 | 84.53 ± 17.38 | 94.86 ± 5.49 |
| C13 | 99.00 ± 1.72 | 82.93 ± 22.18 | 68.93 ± 35.65 | 84.59 ± 16.95 | 94.15 ± 5.53 |
| C14 | 99.17 ± 1.44 | 83.51 ± 21.33 | 70.45 ± 34.78 | 85.30 ± 16.71 | 94.88 ± 5.30 |

**Table S7.** T+AT → T experiment Overall performance metrics. Classification results for the Patch dataset in which the model is trained on both typical and atypical (T+AT) samples, then tested exclusively on typical (T). Each Config represents a unique configuration described in Methods. We provide mean ± standard deviation of F1-scores and Accuracy across all beats.

| **Config** | **F1 score** | | | | **Accuracy** |
| --- | --- | --- | --- | --- | --- |
| **N** | **S** | **V** | **Macro** |
| C1 | 99.32 ± 0.09 | 92.34 ± 1.44 | 89.01 ± 2.86 | 93.56 ± 1.44 | 97.57 ± 0.46 |
| C2 | 99.37 ± 0.07 | 94.55 ± 0.38 | 94.22 ± 0.43 | 96.05 ± 0.24 | 98.30 ± 0.11 |
| C3 | 99.35 ± 0.09 | 94.06 ± 0.72 | 93.14 ± 0.91 | 95.52 ± 0.54 | 98.14 ± 0.22 |
| C4 | 99.39 ± 0.09 | 94.63 ± 0.44 | 94.53 ± 0.16 | 96.18 ± 0.20 | 98.35 ± 0.13 |
| C5 | 99.41 ± 0.08 | 94.47 ± 0.88 | 93.91 ± 1.05 | 95.93 ± 0.66 | 98.30 ± 0.26 |
| C6 | 99.35 ± 0.09 | 92.52 ± 1.47 | 89.29 ± 2.73 | 93.72 ± 1.41 | 97.63 ± 0.46 |
| C7 | 99.38 ± 0.08 | 94.59 ± 0.66 | 94.42 ± 0.42 | 96.13 ± 0.37 | 98.33 ± 0.17 |
| C8 | 99.43 ± 0.07 | 94.93 ± 0.52 | 94.58 ± 0.56 | 96.31 ± 0.37 | 98.43 ± 0.16 |
| C9 | 99.39 ± 0.09 | 94.58 ± 0.57 | 94.23 ± 0.72 | 96.07 ± 0.44 | 98.32 ± 0.19 |
| C10 | 99.36 ± 0.07 | 94.59 ± 0.55 | 94.54 ± 0.65 | 96.16 ± 0.41 | 98.32 ± 0.17 |
| C11 | 99.41 ± 0.05 | 94.65 ± 0.53 | 94.32 ± 0.65 | 96.13 ± 0.38 | 98.35 ± 0.15 |
| C12 | 99.39 ± 0.09 | 94.69 ± 0.60 | 94.43 ± 0.57 | 96.17 ± 0.37 | 98.35 ± 0.18 |
| C13 | 99.42 ± 0.06 | 94.66 ± 0.50 | 94.32 ± 0.61 | 96.13 ± 0.36 | 98.36 ± 0.15 |
| C14 | 99.39 ± 0.07 | 94.64 ± 0.61 | 94.39 ± 0.54 | 96.14 ± 0.39 | 98.34 ± 0.16 |

**Table S8.** T+AT → T experiment Per-patient performance metrics. Classification results for the Patch dataset in which the model is trained on both typical and atypical (T+AT) samples, then tested exclusively on typical (T). Each Config represents a unique configuration described in Methods. We provide mean ± standard deviation of F1-scores and Accuracy across individual patients.

| **Config** | **F1 score** | | | | **Accuracy** |
| --- | --- | --- | --- | --- | --- |
| **N** | **S** | **V** | **Macro** |
| C1 | 99.25 ± 2.17 | 92.95 ± 12.36 | 83.21 ± 28.21 | 93.48 ± 11.05 | 98.01 ± 4.32 |
| C2 | 99.33 ± 1.86 | 95.05 ± 10.20 | 92.72 ± 18.34 | 96.34 ± 7.62 | 98.38 ± 3.97 |
| C3 | 99.29 ± 2.05 | 94.32 ± 12.06 | 91.20 ± 20.34 | 95.70 ± 8.72 | 98.30 ± 3.99 |
| C4 | 99.33 ± 1.82 | 95.00 ± 10.88 | 93.28 ± 17.16 | 96.41 ± 7.61 | 98.42 ± 3.50 |
| C5 | 99.35 ± 1.75 | 94.77 ± 10.74 | 92.11 ± 18.75 | 96.09 ± 7.87 | 98.54 ± 3.31 |
| C6 | 99.28 ± 2.15 | 93.03 ± 11.97 | 84.23 ± 27.58 | 93.75 ± 10.66 | 98.11 ± 4.03 |
| C7 | 99.33 ± 1.78 | 94.94 ± 10.40 | 92.95 ± 17.78 | 96.31 ± 7.52 | 98.52 ± 3.34 |
| C8 | 99.37 ± 1.74 | 95.31 ± 9.98 | 92.87 ± 17.96 | 96.46 ± 7.35 | 98.53 ± 3.07 |
| C9 | 99.32 ± 1.78 | 94.87 ± 10.93 | 92.87 ± 17.89 | 96.26 ± 7.70 | 98.44 ± 3.41 |
| C10 | 99.29 ± 1.92 | 94.90 ± 10.66 | 93.18 ± 17.18 | 96.33 ± 7.56 | 98.32 ± 3.67 |
| C11 | 99.35 ± 1.77 | 95.04 ± 10.11 | 92.79 ± 18.33 | 96.34 ± 7.56 | 98.45 ± 3.45 |
| C12 | 99.34 ± 1.88 | 95.11 ± 10.22 | 93.17 ± 17.32 | 96.45 ± 7.45 | 98.46 ± 3.47 |
| C13 | 99.36 ± 1.72 | 94.98 ± 10.60 | 93.03 ± 17.35 | 96.37 ± 7.43 | 98.50 ± 2.97 |
| C14 | 99.34 ± 1.76 | 95.03 ± 10.26 | 93.19 ± 17.59 | 96.40 ± 7.43 | 98.47 ± 3.46 |

**Table S9.** T+AT → AT experiment Overall performance metrics. Classification results for the Patch dataset in which the model is trained on both typical and atypical (T+AT) samples, then tested exclusively on atypical (AT). Each Config represents a unique configuration described in Methods. We provide mean ± standard deviation of F1-scores and Accuracy across all beats.

| **Config** | **F1 score** | | | | **Accuracy** |
| --- | --- | --- | --- | --- | --- |
| **N** | **S** | **V** | **Macro** |
| C1 | 99.26 ± 0.11 | 85.21 ± 1.65 | 82.17 ± 4.02 | 88.88 ± 1.84 | 95.98 ± 0.53 |
| C2 | 99.21 ± 0.21 | 84.13 ± 2.58 | 77.33 ± 5.22 | 86.89 ± 2.53 | 95.39 ± 0.81 |
| C3 | 99.16 ± 0.12 | 79.64 ± 4.70 | 77.01 ± 3.85 | 85.27 ± 2.8 | 94.70 ± 0.93 |
| C4 | 99.16 ± 0.10 | 84.95 ± 2.63 | 79.66 ± 3.03 | 87.92 ± 1.81 | 95.66 ± 0.60 |
| C5 | 99.26 ± 0.13 | 83.57 ± 4.90 | 80.35 ± 5.27 | 87.73 ± 3.32 | 95.59 ± 1.09 |
| C6 | 99.27 ± 0.11 | 86.19 ± 2.16 | 82.77 ± 3.89 | 89.41 ± 1.98 | 96.14 ± 0.63 |
| C7 | 99.20 ± 0.21 | 85.05 ± 3.85 | 80.44 ± 6.65 | 88.23 ± 3.37 | 95.78 ± 1.05 |
| C8 | 99.16 ± 0.14 | 84.81 ± 2.88 | 79.76 ± 5.25 | 87.91 ± 2.67 | 95.66 ± 0.82 |
| C9 | 99.17 ± 0.09 | 86.41 ± 3.34 | 82.19 ± 4.80 | 89.26 ± 2.62 | 96.07 ± 0.81 |
| C10 | 99.27 ± 0.10 | 85.81 ± 3.14 | 81.93 ± 3.06 | 89.00 ± 2.05 | 96.04 ± 0.66 |
| C11 | 99.18 ± 0.10 | 85.11 ± 4.31 | 81.73 ± 6.09 | 88.67 ± 3.34 | 95.86 ± 1.06 |
| C12 | 99.17 ± 0.09 | 85.13 ± 3.41 | 79.90 ± 5.82 | 88.07 ± 2.96 | 95.71 ± 0.89 |
| C13 | 99.16 ± 0.16 | 86.08 ± 3.96 | 81.91 ± 5.66 | 89.05 ± 3.18 | 95.98 ± 1.06 |
| C14 | 99.09 ± 0.22 | 84.97 ± 2.70 | 80.22 ± 4.87 | 88.09 ± 2.38 | 95.64 ± 0.73 |

**Table S10.** T+AT → AT experiment Per-patient performance metrics. Classification results for the Patch dataset in which the model is trained on both typical and atypical (T+AT) samples, then tested exclusively on atypical (AT). Each Config represents a unique configuration described in Methods. We provide mean ± standard deviation of F1-scores and Accuracy across individual patients.

| **Config** | **F1 score** | | | | **Accuracy** |
| --- | --- | --- | --- | --- | --- |
| **N** | **S** | **V** | **Macro** |
| C1 | 99.23 ± 1.38 | 84.75 ± 20.64 | 75.24 ± 32.90 | 87.12 ± 15.44 | 95.85 ± 4.27 |
| C2 | 99.13 ± 1.63 | 84.52 ± 20.66 | 72.16 ± 35.80 | 86.06 ± 16.67 | 95.27 ± 5.33 |
| C3 | 99.11 ± 1.68 | 76.86 ± 28.59 | 74.94 ± 32.56 | 84.36 ± 17.87 | 93.74 ± 6.10 |
| C4 | 99.11 ± 1.69 | 84.72 ± 21.57 | 76.79 ± 31.24 | 87.51 ± 15.49 | 95.89 ± 4.49 |
| C5 | 99.27 ± 1.45 | 82.20 ± 24.69 | 77.11 ± 31.98 | 87.01 ± 16.28 | 94.94 ± 5.55 |
| C6 | 99.27 ± 1.35 | 85.87 ± 19.80 | 77.55 ± 30.94 | 88.22 ± 14.95 | 95.80 ± 4.55 |
| C7 | 99.13 ± 1.47 | 84.71 ± 20.20 | 75.63 ± 34.15 | 87.21 ± 16.05 | 94.39 ± 5.27 |
| C8 | 99.11 ± 1.63 | 85.16 ± 18.61 | 73.61 ± 35.07 | 86.80 ± 16.00 | 94.65 ± 5.26 |
| C9 | 99.11 ± 1.63 | 86.59 ± 19.21 | 77.85 ± 31.77 | 88.54 ± 14.89 | 94.99 ± 5.12 |
| C10 | 99.22 ± 1.47 | 86.03 ± 19.88 | 77.38 ± 31.64 | 88.19 ± 15.16 | 95.09 ± 4.93 |
| C11 | 99.11 ± 1.55 | 84.90 ± 20.43 | 76.80 ± 33.04 | 87.68 ± 15.71 | 94.91 ± 4.47 |
| C12 | 99.08 ± 1.68 | 84.97 ± 21.03 | 76.15 ± 33.42 | 87.45 ± 16.05 | 95.20 ± 4.69 |
| C13 | 99.11 ± 1.50 | 85.82 ± 19.77 | 77.79 ± 31.32 | 88.25 ± 14.90 | 95.14 ± 4.57 |
| C14 | 99.02 ± 1.75 | 84.19 ± 21.82 | 74.65 ± 34.86 | 86.75 ± 16.30 | 95.06 ± 5.28 |

**3.2 MIT-BIH dataset results and DS2 description**

For MIT-BIH, we have one primary experiment: DS1 → DS2. Similar to Patch, we evaluate it with overall performance and per-patient performance.

**Table S11.** DS1 → DS2 experiment Overall performance metrics. Classification results for the Patch dataset in which the model is trained on DS1 samples and tested on DS2 samples. Each Config represents a unique configuration described in Methods. We provide mean ± standard deviation of F1-scores and Accuracy across all beats.

| **Config** | **F1 score** | | | | **Accuracy** |
| --- | --- | --- | --- | --- | --- |
| **N** | **S** | **V** | **Macro** |
| C1 | 99.52 | 57.91 | 88.21 | 81.88 | 98.33 |
| C2 | 99.09 | 62.02 | 88.23 | 83.12 | 97.92 |
| C3 | 99.56 | 61.17 | 92.00 | 84.25 | 98.60 |
| C4 | 99.59 | 74.58 | 94.29 | 89.48 | 98.93 |
| C5 | 99.49 | 55.10 | 92.95 | 82.51 | 98.59 |
| C6 | 99.56 | 13.41 | 88.08 | 67.02 | 98.21 |
| C7 | 99.39 | 63.34 | 93.50 | 85.41 | 98.57 |
| C8 | 99.57 | 71.22 | 95.75 | 88.85 | 99.02 |
| C9 | 99.53 | 69.99 | 93.09 | 87.54 | 98.74 |
| C10 | 99.59 | 65.92 | 93.23 | 86.25 | 98.75 |
| C11 | 99.59 | 70.71 | 94.27 | 88.19 | 98.87 |
| C12 | 99.63 | 58.99 | 92.85 | 83.82 | 98.71 |
| C13 | 99.01 | 75.78 | 87.08 | 87.29 | 97.89 |
| C14 | 99.05 | 62.82 | 85.85 | 82.57 | 97.72 |

**Table S12.** DS1 → DS2 experiment Per-patient performance metrics. Classification results for the Patch dataset in which the model is trained on DS1 samples and tested on DS2 samples. Each Config represents a unique configuration described in Methods. We provide mean ± standard deviation of F1-scores and Accuracy across individual patients.

| **Config** | **F1 score** | | | | **Accuracy** |
| --- | --- | --- | --- | --- | --- |
| **N** | **S** | **V** | **Macro** |
| C1 | 98.22 ± 4.41 | 60.34 ± 37.15 | 75.48 ± 28.07 | 82.44 ± 17.86 | 96.02 ± 7.54 |
| C2 | 97.92 ± 3.91 | 56.67 ± 39.58 | 74.85 ± 28.26 | 81.34 ± 19.25 | 96.03 ± 6.86 |
| C3 | 98.43 ± 3.90 | 63.65 ± 33.04 | 81.23 ± 31.20 | 85.30 ± 14.15 | 96.72 ± 6.75 |
| C4 | 98.80 ± 2.81 | 58.35 ± 41.36 | 79.23 ± 29.44 | 83.62 ± 19.80 | 97.68 ± 4.87 |
| C5 | 98.02 ± 4.40 | 56.54 ± 35.05 | 83.93 ± 26.10 | 83.99 ± 15.81 | 96.83 ± 5.62 |
| C6 | 97.85 ± 5.66 | 23.86 ± 33.75 | 73.25 ± 32.13 | 72.70 ± 22.74 | 95.19 ± 9.18 |
| C7 | 98.31 ± 3.30 | 57.00 ± 37.75 | 85.24 ± 19.22 | 84.29 ± 15.13 | 97.18 ± 5.31 |
| C8 | 98.82 ± 2.42 | 63.90 ± 35.01 | 83.27 ± 22.81 | 86.00 ± 14.97 | 98.07 ± 3.61 |
| C9 | 98.33 ± 4.23 | 56.01 ± 41.06 | 80.94 ± 24.62 | 83.29 ± 17.74 | 97.42 ± 5.19 |
| C10 | 98.47 ± 3.83 | 59.37 ± 40.82 | 75.84 ± 30.54 | 82.52 ± 19.53 | 97.07 ± 6.09 |
| C11 | 98.92 ± 3.13 | 58.19 ± 42.36 | 82.01 ± 25.53 | 84.54 ± 19.11 | 97.75 ± 5.72 |
| C12 | 99.26 ± 1.71 | 53.13 ± 41.51 | 75.57 ± 29.73 | 80.93 ± 19.08 | 97.87 ± 3.93 |
| C13 | 97.54 ± 5.53 | 60.44 ± 44.75 | 69.77 ± 33.15 | 80.65 ± 18.93 | 96.14 ± 7.84 |
| C14 | 98.15 ± 4.47 | 46.91 ± 41.39 | 86.92 ± 21.20 | 82.09 ± 17.26 | 96.74 ± 6.77 |

**Table S13.** Number of beats of MIT-BIH dataset DS2. This table lists the beat distribution for each patient included in DS2 of the MIT-BIH dataset. Total indicates the total number of annotated beats for that patient, while N, S, and V represent counts of normal, supraventricular, and ventricular beats, respectively. This breakdown provides an overview of class prevalence across the patient population used for testing in DS2.

| **Patient** | **Total** | **N** | **S** | **V** |
| --- | --- | --- | --- | --- |
| 100 | 2267 | 2233 | 33 | 1 |
| 103 | 2078 | 2076 | 2 | 0 |
| 105 | 2541 | 2500 | 0 | 41 |
| 111 | 2118 | 2117 | 0 | 1 |
| 113 | 1789 | 1783 | 6 | 0 |
| 117 | 1529 | 1528 | 1 | 0 |
| 121 | 1857 | 1855 | 1 | 1 |
| 123 | 1512 | 1509 | 0 | 3 |
| 200 | 2539 | 1719 | 30 | 790 |
| 202 | 1071 | 1013 | 41 | 17 |
| 210 | 21 | 8 | 0 | 13 |
| 212 | 2742 | 2742 | 0 | 0 |
| 213 | 2078 | 1971 | 25 | 82 |
| 214 | 2231 | 1983 | 0 | 248 |
| 219 | 315 | 295 | 7 | 13 |
| 221 | 27 | 17 | 0 | 10 |
| 222 | 1176 | 1063 | 113 | 0 |
| 228 | 2047 | 1683 | 3 | 361 |
| 231 | 1565 | 1562 | 1 | 2 |
| 232 | 574 | 395 | 179 | 0 |
| 233 | 2978 | 2175 | 7 | 796 |
| 234 | 2693 | 2690 | 0 | 3 |
